# Supplementary material
Source: PubMed Central journal article supplement (PMC3332064)
Supplement: NIHMS364763-supplement-01.pdf [file NIHMS364763-supplement-01.pdf]

**SUPPLEMENTAL MATERIAL.**

**Evaluating pathogenicity of rare variants from dilated cardiomyopathy in the exome era**

Nadine Norton<sup>1</sup>, Peggy D. Robertson<sup>2</sup>, Mark J. Rieder<sup>2</sup>, Stephan Zuchner<sup>3</sup>, Evadnie Rampersaud<sup>3</sup>, Eden Martin<sup>3</sup>, Duanxiang Li<sup>1</sup>, Deborah A. Nickerson<sup>2</sup>, Ray E. Hershberger<sup>1</sup>

On behalf NHLBI GO Exome Sequencing Project

From the <sup>1</sup>Cardiovascular Division, Department of Medicine, the <sup>2</sup>Department of Genome Sciences, University of Washington, Seattle, WA and the <sup>3</sup>Hussman Institute for Human Genomics, University of Miami Miller School of Medicine, Miami, Florida.

**Supplemental methods.** The ESP2500 dataset is composed of individuals obtained from a number of large-scale NHLBI cohorts. It includes exome sequence data from individuals from the Women's Health Initiative, Framingham Heart Study, Jackson Heart Study, Multi-Ethnic Study of Atherosclerosis, Atherosclerosis Risk in Communities, Coronary Artery Risk Development in Young Adults, Cardiovascular Health Study, Genomic Research on Asthma in the African Diaspora, Lung Health Study, Pulmonary Arterial Hypertension population, Acute Lung Injury cohort, and the Cystic Fibrosis cohort. Subsets of samples were selected from these cohorts based on phenotypic criteria. Generally, individuals were selected as controls, or from extreme phenotypes. Extremes of lung phenotypes would include CF-Pseudomonas infection response, chronic obstructive pulmonary disease and pulmonary arterial hypertension. Other cardiovascular phenotypes include extremes of LDL levels, early onset stroke, and BMI/Type 2 diabetes status. Even though these samples were selected as extremes of specific phenotypes they are useful as controls for other unlinked phenotypes. Gender information was available for 2,422 of the total 2,439 individuals, of which 1,688, (69.7%) were female and 734, (30.3%) were male.

Exome sequencing was performed at the Broad Institute or the University of Washington. Single base variant data for these analyses are available on the ESP Exome Variant Server (EVS - [snp.gs.washington.edu/EVS/](http://snp.gs.washington.edu/EVS/)).

Legend supplemental table 1.

DCM variants reported in literature with genomic co-ordinates, hg19. Reference and variant nucleotides are reported on the positive strand for each position.

Legend supplemental table 2.

ESP dataset % sequence coverage >10x read depth for each DCM gene. \* RBM20 was not targeted for sequence capture in this ESP dataset. In fr del; in frame deletion. Genomic co-ordinates are hg19.

**Supplemental table 1.**

| <b>Gene</b> | <b>Variant</b> | <b>Genomic co-ordinates</b> | <b>ref base (+)</b> | <b>variant base (+)</b> |
|-------------|----------------|-----------------------------|---------------------|-------------------------|
| ABCC9       | Leu1524fs      | chr12:21958186-21958188     | TAA                 | ATTT                    |
| ABCC9       | Ala1513Thr     | chr12:21958221-21958221     | C                   | T                       |
| ACTC1       | Glu361Gly      | chr15:35082659-35082659     | T                   | C                       |
| ACTC1       | Arg314His      | chr15:35083364-35083364     | C                   | T                       |
| ACTN2       | Gln9Arg        | chr1:236849999-236849999    | A                   | G                       |
| ANKRD1      | Ala276Val      | chr10:92675321-92675321     | C                   | T                       |
| ANKRD1      | Leu199Arg      | chr10:92675983-92675983     | A                   | C                       |
| ANKRD1      | Thr116Met      | chr10:92678728-92678728     | G                   | A                       |
| ANKRD1      | Arg66Gln       | chr10:92679936-92679936     | C                   | T                       |
| ANKRD1      | Glu57Gln       | chr10:92679964-92679964     | C                   | G                       |
| BAG3        | Arg71Trp       | chr10:121429393-121429393   | C                   | T                       |
| BAG3        | Arg90stop      | chr10:121429450-121429450   | C                   | T                       |
| BAG3        | His109Arg      | chr10:121429508-121429508   | A                   | G                       |
| BAG3        | Arg123stop     | chr10:121429549-121429549   | C                   | T                       |
| BAG3        | Arg218GlyfsX89 | chr10:121431911-121431911   | C                   | -                       |
| BAG3        | Gln251ArgfsX56 | chr10:121432011-121432011   | A                   | -                       |
| BAG3        | Ala262Thr      | chr10:121432043-121432043   | G                   | A                       |
| BAG3        | Arg309X        | chr10:121435991-121435991   | C                   | T                       |
| BAG3        | Ser385GlnfsX56 | chr10:121436219-121436226   | TCTCCCC             | -                       |
| BAG3        | Arg395fs48     | chr10:121436248-121436249   | GA                  | -                       |
| BAG3        | Glu455Lys      | chr10:121436429-121436429   | G                   | A                       |
| BAG3        | Val468Met      | chr10:121436468-121436468   | G                   | A                       |
| BAG3        | Arg477His      | chr10:121436496-121436496   | G                   | A                       |
| CRYAB       | Arg157His      | chr11:111779546-111779546   | C                   | T                       |
| CSRP3       | Lys69Arg       | chr11:19209758-19209758     | T                   | C                       |
| CSRP3       | Trp4Arg        | chr11:19213986-19213986     | A                   | G                       |
| CSRP3       | Gly72Arg       | chr11:19209750-19209750     | C                   | T                       |
| DES         | Glu108Lys      | chr2:220283506-220283506    | G                   | A                       |
| DES         | Ser298Leu      | chr2:220285374-220285374    | C                   | T                       |
| DES         | Asp312Asn      | chr2:220285586-220285586    | G                   | A                       |
| DES         | Arg350Trp      | chr2:220286086-220286086    | C                   | T                       |
| DES         | Ile451Met      | chr2:220290449-220290449    | C                   | G                       |
| DES         | Val459Ile      | chr2:220290469-220290469    | G                   | A                       |
| ILK         | Ala262Val      | chr11:6630799-6630799       | C                   | T                       |
| LAMA4       | Pro943Leu      | chr6:112462089-112462089    | G                   | A                       |
| LDB3        | Ser196Leu      | chr10:88441437-88441437     | C                   | T                       |
| LDB3        | Thr213Ile      | chr10:88441488-88441488     | C                   | T                       |
| LDB3        | Asp117Asn      | chr10:88446830-88446830     | G                   | A                       |

|      |                      |                          |    |        |
|------|----------------------|--------------------------|----|--------|
| LDB3 | Lys136Met            | chr10:88446888-88446888  | A  | T      |
| LDB3 | Lys204Arg            | chr10:88451715-88451715  | A  | G      |
| LDB3 | Ile352Met            | chr10:88466426-88466426  | C  | G      |
| LDB3 | Ala698Thr            | chr10:88486007-88486007  | G  | A      |
| LMNA | 28insA               | chr1:156084737-156084738 | AC | AAC    |
| LMNA | Ser22Leu             | chr1:156084774-156084774 | C  | T      |
| LMNA | Arg60Gly             | chr1:156084887-156084887 | C  | G      |
| LMNA | Leu85Arg             | chr1:156084963-156084963 | T  | G      |
| LMNA | Arg89Leu             | chr1:156084975-156084975 | G  | T      |
| LMNA | Lys97Glu             | chr1:156084998-156084998 | A  | G      |
| LMNA | Arg101Pro            | chr1:156085011-156085011 | G  | C      |
| LMNA | Glu111X              | chr1:156085040-156085040 | G  | T      |
| LMNA | splice site 357-1G>T | chr1:156100407-156100407 | G  | T      |
| LMNA | Ala132Pro            | chr1:156100445-156100445 | G  | C      |
| LMNA | Ser143Pro            | chr1:156100478-156100478 | T  | C      |
| LMNA | Glu161Lys            | chr1:156100532-156100532 | G  | A      |
| LMNA | Arg166Pro            | chr1:156100548-156100548 | G  | C      |
| LMNA | Arg190Trp            | chr1:156104248-156104248 | C  | T      |
| LMNA | Arg190Gln            | chr1:156104249-156104249 | G  | A      |
| LMNA | Asp192Gly            | chr1:156104255-156104255 | A  | G      |
| LMNA | Asn195Lys            | chr1:156104265-156104265 | C  | G      |
| LMNA | Glu203Lys            | chr1:156104287-156104287 | G  | A      |
| LMNA | Glu203Gly            | chr1:156104288-156104288 | A  | G      |
| LMNA | Ile210Ser            | chr1:156104309-156104309 | T  | G      |
| LMNA | Leu215Pro            | chr1:156104600-156104600 | T  | C      |
| LMNA | Arg225X              | chr1:156104629-156104629 | C  | T      |
| LMNA | Gln234X              | chr1:156104656-156104656 | C  | T      |
| LMNA | delCT                | chr1:156105075-156105076 | CT | -      |
| LMNA | Glu317Lys            | chr1:156105704-156105704 | G  | A      |
| LMNA | Ala318Thr            | chr1:156105707-156105707 | G  | A      |
| LMNA | frameshift           | chr1:156105714-156105714 | T  | -      |
| LMNA | Gln355Stop           | chr1:156105818-156105818 | C  | T      |
| LMNA | delT                 | chr1:156105840-156105840 | T  | -      |
| LMNA | Glu372ArgfsX107      | chr1:156105869-156105869 | G  | -      |
| LMNA | Arg377His            | chr1:156105885-156105885 | G  | A      |
| LMNA | Arg388His            | chr1:156106010-156106010 | G  | A      |
| LMNA | Arg399Cys            | chr1:156106042-156106042 | C  | T      |
| LMNA | Ser437HisfsX1        | chr1:156106154-156106155 | CT | CGCACT |
| LMNA | Arg471His            | chr1:156106743-156106743 | G  | A      |
| LMNA | Gly474-Asp475insGlu  | chr1:156106755-156106756 | AT | AAGAT  |
| LMNA | Tyr481Stop           | chr1:156106774-156106774 | C  | G      |
| LMNA | delG                 | chr1:156106908-156106908 | G  | -      |
| LMNA | insCTGC              | chr1:156106994-156106995 | CG | CCTGCG |

|        |                  |                          |   |   |
|--------|------------------|--------------------------|---|---|
| LMNA   | Arg541Ser        | chr1:156107457-156107457 | C | A |
| LMNA   | Arg571Ser        | chr1:156107547-156107547 | C | A |
| LMNA   | Ser573Leu        | chr1:156108298-156108298 | C | T |
| LMNA   | Arg654X          | chr1:156108540-156108540 | C | T |
| MYBPC3 | Asn948Thr        | chr11:47356655-47356655  | T | G |
| MYBPC3 | Glu619Lys        | chr11:47362731-47362731  | C | T |
| MYBPC3 | Thr494Ile        | chr11:47364272-47364272  | G | A |
| MYBPC3 | Arg326Gln        | chr11:47367871-47367871  | C | T |
| MYBPC3 | Cys1264Phe       | chr11:47353646-47353646  | C | A |
| MYBPC3 | Gly1260Asp       | chr11:47353658-47353658  | C | T |
| MYBPC3 | Splice site 31+1 | chr11:47354364-47354364  | C | A |
| MYBPC3 | Splice site 29+1 | chr11:47355107-47355107  | C | T |
| MYBPC3 | Pro910Thr        | chr11:47357437-47357437  | G | T |
| MYBPC3 | Ala833Thr        | chr11:47359047-47359047  | C | T |
| MYBPC3 | Asp605Gly        | chr11:47362772-47362772  | T | C |
| MYBPC3 | Met555Thr        | chr11:47363668-47363668  | A | G |
| MYBPC3 | Gly490Arg        | chr11:47364285-47364285  | C | T |
| MYBPC3 | Arg272Cys        | chr11:47369415-47369415  | G | A |
| MYBPC3 | Lys202Gln        | chr11:47371375-47371375  | T | G |
| MYBPC3 | Gly5Arg          | chr11:47374186-47374186  | C | G |
| MYH6   | Glu1457Lys       | chr14:23857123-23857123  | C | T |
| MYH6   | Ala1004Ser       | chr14:23862646-23862646  | C | A |
| MYH6   | Pro830Leu        | chr14:23863473-23863473  | G | A |
| MYH6   | Gly1826Asn       | chr14:23853739-23853739  | C | T |
| MYH6   | Arg1502Gln       | chr14:23856987-23856987  | C | T |
| MYH6   | Ala1440Pro       | chr14:23857405-23857405  | C | G |
| MYH6   | Arg1177Trp       | chr14:23859469-23859469  | T | C |
| MYH6   | Arg568Cys        | chr14:23868126-23868126  | G | A |
| MYH6   | Ile275Asn        | chr14:23872631-23872631  | A | T |
| MYH7   | Arg1832Cys       | chr14:23884269-23884269  | G | A |
| MYH7   | Arg1634Cys       | chr14:23885266-23885266  | G | A |
| MYH7   | Glu1426Lys       | chr14:23886789-23886789  | C | T |
| MYH7   | Arg1193Ser       | chr14:23889203-23889203  | G | T |
| MYH7   | Leu1038Pro       | chr14:23892756-23892756  | A | G |
| MYH7   | Thr1019Asn       | chr14:23892799-23892799  | G | T |
| MYH7   | Phe764Leu        | chr14:23894622-23894622  | G | C |
| MYH7   | Ser642Leu        | chr14:23896480-23896480  | G | A |
| MYH7   | Lys637Glu        | chr14:23896496-23896496  | T | C |
| MYH7   | Ala550Val        | chr14:23897033-23897033  | G | A |
| MYH7   | Ser532Pro        | chr14:23897088-23897088  | A | G |
| MYH7   | Arg442His        | chr14:23898246-23898246  | C | T |
| MYH7   | Thr412Asn        | chr14:23898460-23898460  | G | T |
| MYH7   | Ala223Thr        | chr14:23900859-23900859  | C | T |

|       |             |                          |     |      |
|-------|-------------|--------------------------|-----|------|
| MYH7  | Ile201Thr   | chr14:23901007-23901007  | A   | G    |
| MYH7  | His1901Gln  | chr14:23883054-23883054  | G   | C    |
| MYH7  | Arg1863Gln  | chr14:23883282-23883282  | A   | G    |
| MYH7  | Gly1808Ala  | chr14:23884339-23884339  | C   | G    |
| MYH7  | Val1691Met  | chr14:23884923-23884923  | C   | T    |
| MYH7  | Glu1619Lys  | chr14:23885310-23885310  | C   | T    |
| MYH7  | Arg1500Trp  | chr14:23886383-23886383  | G   | A    |
| MYH7  | Arg1359Cys  | chr14:23887512-23887512  | G   | A    |
| MYH7  | Asp1096Tyr  | chr14:23890217-23890217  | C   | A    |
| MYH7  | Arg1045Cys  | chr14:23891501-23891501  | G   | A    |
| MYH7  | Ala970Val   | chr14:23893129-23893129  | G   | A    |
| MYH7  | Val964Leu   | chr14:23893148-23893148  | C   | G    |
| MYH7  | Arg237Trp   | chr14:23900817-23900817  | G   | A    |
| MYPN  | Ile83fsX105 | chr10:69881443-69881443  | T   | -    |
| MYPN  | Arg1088His  | chr10:69957213-69957213  | G   | A    |
| MYPN  | Pro1112Leu  | chr10:69959174-69959174  | C   | T    |
| MYPN  | Val1195Met  | chr10:69961675-69961675  | G   | A    |
| PLN   | Arg9Cys     | chr6:118880109-118880109 | C   | T    |
| PLN   | Arg14del    | chr6:118880124-118880126 | AGA | -    |
| PLN   | L39stop     | chr6:118880200-118880200 | T   | G    |
| PSEN1 | Asp333Gly   | chr14:73678519-73678519  | A   | G    |
| PSEN2 | Ser130Leu   | chr1:227073271-227073271 | C   | T    |
| SCN5A | Asp1595His  | chr3:38595800-38595800   | C   | G    |
| SCN5A | Asp1275Asn  | chr3:38607917-38607917   | C   | T    |
| SCN5A | insTG       | chr3:38627417-38627418   | TT  | TCAT |
| SCN5A | Arg814Trp   | chr3:38627529-38627529   | G   | A    |
| SCN5A | Thr220Ile   | chr3:38655278-38655278   | G   | A    |
| SCN5A | Pro2005Ala  | chr3:38591847-38591847   | G   | C    |
| SCN5A | Ile1835Thr  | chr3:38592356-38592356   | A   | G    |
| SCN5A | Pro648Leu   | chr3:38640489-38640489   | G   | A    |
| SCN5A | Arg222Gln   | chr3:38655272-38655272   | C   | T    |
| SCN5A | Ser216Leu   | chr3:38655290-38655290   | G   | A    |
| SGCD  | Arg71Thr    | chr5:155935630-155935630 | G   | C    |
| SGCD  | Lys238 del  | chr5:156184728-156184730 | AAG | -    |
| TCAP  | Glu132Gln   | chr17:37822252-37822252  | G   | C    |
| TCAP  | Arg18Gln    | chr17:37821665-37821665  | G   | C    |
| TCAP  | Glu49Lys    | chr17:37822003-37822003  | G   | A    |
| TMPO  | Arg690Cys   | chr12:98928103-98928103  | C   | T    |
| TNNC1 | Gly159Asp   | chr3:52485301-52485301   | C   | T    |
| TNNC1 | Ile148Val   | chr3:52485419-52485419   | T   | C    |
| TNNC1 | Asp145Glu   | chr3:52485426-52485426   | G   | T    |
| TNNC1 | Met103Ile   | chr3:52485768-52485768   | C   | T    |
| TNNC1 | Tyr5His     | chr3:52488019-52488019   | A   | G    |

|       |                  |                          |     |   |
|-------|------------------|--------------------------|-----|---|
| TNNI3 | Asn185Lys        | chr19:55663280-55663280  | G   | C |
| TNNI3 | Lys36Gln         | chr19:55668420-55668420  | T   | G |
| TNNI3 | Ala2Val          | chr19:55668953-55668953  | G   | A |
| TNNI3 | Asp180Gly        | chr19:55665408-55665408  | T   | C |
| TNNT2 | Asp270Asn        | chr1:201328764-201328764 | C   | T |
| TNNT2 | Lys247Arg        | chr1:201330447-201330447 | T   | C |
| TNNT2 | Lys210del        | chr1:201331099-201331101 | CTC | - |
| TNNT2 | Arg205Leu        | chr1:201331116-201331116 | C   | A |
| TNNT2 | Ala172Ser        | chr1:201332480-201332480 | C   | A |
| TNNT2 | Arg141Trp        | chr1:201333464-201333464 | G   | A |
| TNNT2 | Arg131Trp        | chr1:201333494-201333494 | G   | A |
| TNNT2 | Glu244Asp        | chr1:201330455-201330455 | C   | A |
| TNNT2 | Arg205Trp        | chr1:201331117-201331117 | G   | A |
| TNNT2 | Arg159Gln        | chr1:201332518-201332518 | C   | T |
| TNNT2 | Arg151Cys        | chr1:201333434-201333434 | G   | A |
| TNNT2 | Arg134Gly        | chr1:201333485-201333485 | G   | C |
| TPM1  | Glu40Lys         | chr15:63336229-63336229  | G   | A |
| TPM1  | Glu54Lys         | chr15:63336271-63336271  | G   | A |
| TPM1  | Asp230Asn        | chr15:63354462-63354462  | G   | A |
| TPM1  | Lys15Asn         | chr15:63335073-63335073  | G   | T |
| TPM1  | Glu23Gln         | chr15:63335095-63335095  | G   | C |
| TPM1  | Ser16Ile         | chr15:63340821-63340821  | G   | T |
| TPM1  | Ile92Thr         | chr15:63349218-63349218  | T   | C |
| TPM1  | Ala239Thr        | chr15:63354787-63354787  | G   | A |
| TPM1  | Ala277Val        | chr15:63356320-63356320  | C   | T |
| TTN   | Glu20963LysfsX10 | chr2:179417542-179417542 | C   | - |
| TTN   | Trp930Arg        | chr2:179647707-179647707 | A   | G |
| VCL   | Ala934Val        | chr10:75871722-75871722  | C   | T |
| VCL   | Leu954del        | chr10:75871783-75871785  | GTT | - |
| VCL   | Arg975Trp        | chr10:75871844-75871844  | C   | T |



Supplemental table 2.

| Gene          | Chr | Start     | Stop      | Targets(bp) | Coverage(bp) | Coverage% |
|---------------|-----|-----------|-----------|-------------|--------------|-----------|
| <i>ABCC9</i>  | 12  | 21950323  | 22089628  | 8698        | 8905         | 100       |
| <i>ACTC1</i>  | 15  | 35080297  | 35087927  | 1753        | 1751         | 99.89     |
| <i>ACTN2</i>  | 1   | 236849770 | 236927558 | 4878        | 4877         | 99.98     |
| <i>ANKRD1</i> | 10  | 92671857  | 92681032  | 1947        | 1946         | 99.95     |
| <i>BAG3</i>   | 10  | 121410882 | 121437331 | 2140        | 2132         | 99.63     |
| <i>CRYAB</i>  | 11  | 111779350 | 111782473 | 562         | 808          | 100       |
| <i>CSRP3</i>  | 11  | 19203578  | 19223589  | 1108        | 1108         | 100       |
| <i>DES</i>    | 2   | 220283099 | 220291461 | 2413        | 2343         | 97.1      |
| <i>ILK</i>    | 11  | 6625207   | 6632101   | 2560        | 2561         | 100       |
| <i>LAMA4</i>  | 6   | 112429134 | 112575828 | 11122       | 10066        | 90.51     |
| <i>LDB3</i>   | 10  | 88428426  | 88495825  | 4012        | 4168         | 100       |
| <i>LMNA</i>   | 1   | 156084461 | 156109878 | 3828        | 3782         | 98.8      |
| <i>MYBPC3</i> | 11  | 47352957  | 47374253  | 7206        | 7128         | 98.92     |
| <i>MYH6</i>   | 14  | 23851199  | 23877482  | 9739        | 9887         | 100       |
| <i>MYH7</i>   | 14  | 23881947  | 23904870  | 10095       | 10095        | 100       |
| <i>MYPN</i>   | 10  | 69869250  | 69971774  | 6024        | 6019         | 99.92     |
| <i>PLN</i>    | 6   | 118869442 | 118881587 | 263         | 263          | 100       |
| <i>PSEN1</i>  | 14  | 73603143  | 73690399  | 2451        | 2448         | 99.88     |
| <i>PSEN2</i>  | 1   | 227058273 | 227083804 | 2573        | 2573         | 100       |
| <i>RBM20*</i> | 10  | 112394203 | 112589217 |             |              |           |
| <i>SCN5A</i>  | 3   | 38589553  | 38691163  | 9003        | 8987         | 99.82     |
| <i>SGCD</i>   | 5   | 155753767 | 156194799 | 1751        | 1742         | 99.49     |
| <i>TCAP</i>   | 17  | 37821599  | 37822807  | 498         | 671          | 100       |
| <i>TMPO</i>   | 12  | 98909409  | 98942735  | 3900        | 3811         | 97.72     |
| <i>TNNC1</i>  | 3   | 52485107  | 52488057  | 1063        | 1156         | 100       |
| <i>TNNI3</i>  | 19  | 55663135  | 55669100  | 1453        | 1433         | 98.62     |
| <i>TNNT2</i>  | 1   | 201328142 | 201346805 | 3177        | 2979         | 93.77     |
| <i>TPM1</i>   | 15  | 63334838  | 63364114  | 2937        | 2903         | 98.84     |
| <i>TTN</i>    | 2   | 179390716 | 179672150 | 147177      | 146906       | 99.82     |
| <i>VCL</i>    | 10  | 75757872  | 75879918  | 5693        | 5684         | 99.84     |
